# Supplementary material
Source: ML conference proceedings conference paper supplement (https://openreview.net/forum?id=UwvjJZWjPT)
Supplement: supplementary_material [file attachment]

**a**

Accuracy

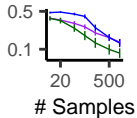

— MTL  
— PT+FT  
— STL

**b**

Accuracy

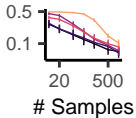

— MTL  
— PT+FT  
— STL

**c**

Scaling  
2.000  
0.125

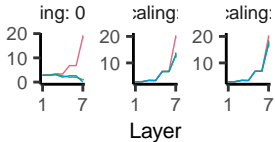

+ PR Pre  
+ PR Post  
+ ENSD

**d**

Accuracy

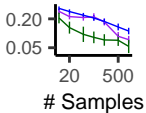

— MTL  
— PT+FT  
— STL

**e**

Accuracy

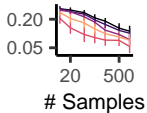

— MTL  
— PT+FT  
— STL

**f**

Scaling  
2.000  
0.125

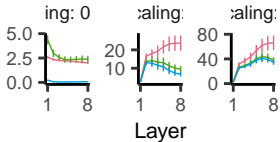

+ PR Pre  
+ PR Post  
+ ENSD
