# Supplementary material
Source: ML conference proceedings conference paper supplement (https://openreview.net/forum?id=UwvjJZWjPT)

**a**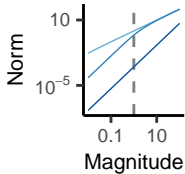**b**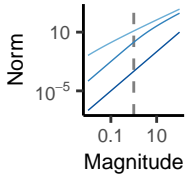**c**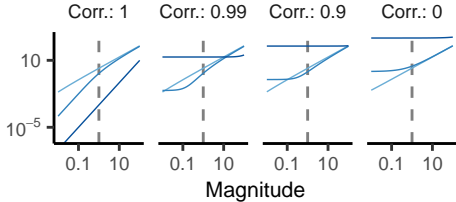

Supplement: supplementary_material [file attachment]

**a**

— MTL  
— PT+FT  
— STL

**b**

— STL  
— PT+FT (Corr.: 1)  
— PT+FT (Corr.: 0.9)  
— PT+FT (Corr.: 0.8)

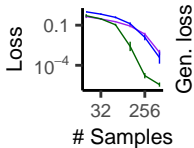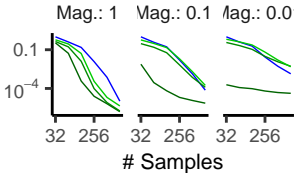

Supplement: supplementary_material [file attachment]

**a**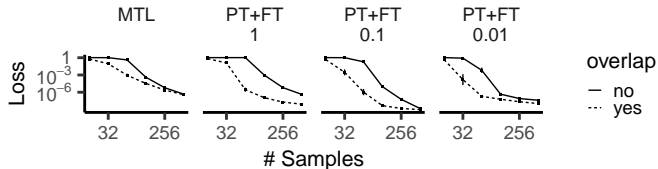**b**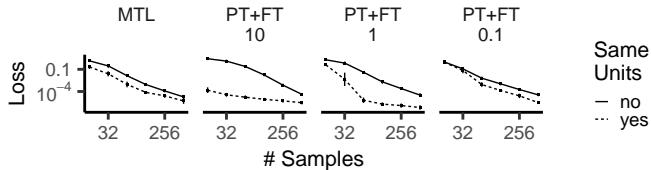

Supplement: supplementary_material [file attachment]

**a**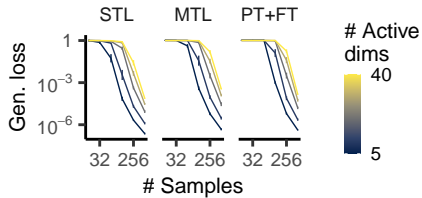**c**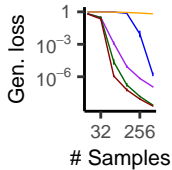**e**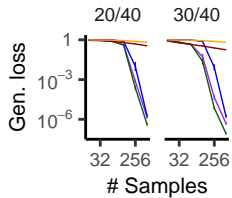**b**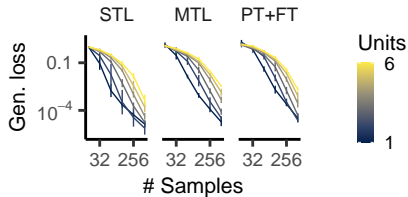**d**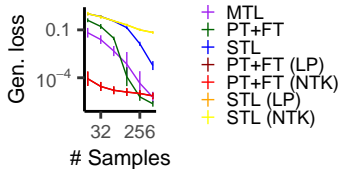**f**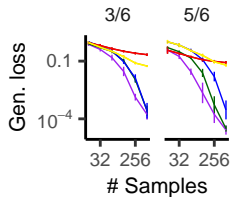

Supplement: supplementary_material [file attachment]

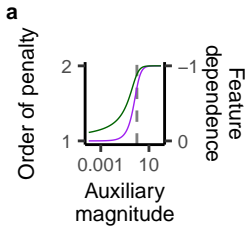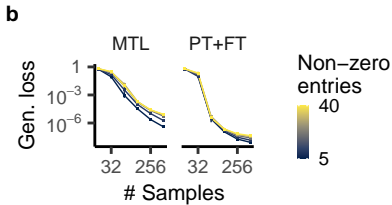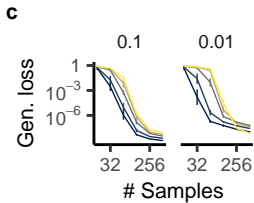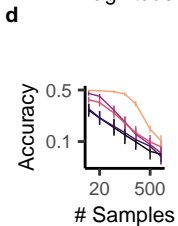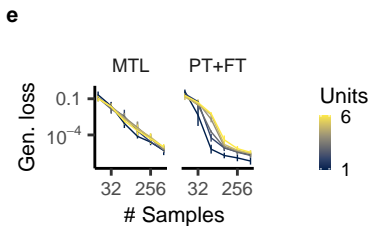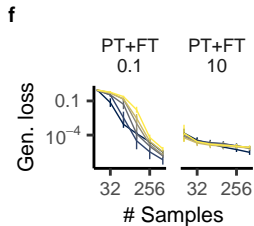

Supplement: supplementary_material [file attachment]
